# Supplementary material for: Theoretical investigation of Janus Ti2BST (T = O, Se) monolayers as anode materials for Na/K-ion batteries
Source: Royal Society of Chemistry journal article supplement (doi:10.1039/d4cp01188k), 2024-01-01
Supplement: d4cp01188k1.pdf [file d4cp01188k1.pdf]

## Supporting Information

### Theoretical investigate of Janus $Ti_2BST$ ( $T = O, Se$ ) monolayers as anode materials for Na/K-ion batteries

Yanzong Wang,<sup>\*a</sup> Lili Xie,<sup>a, b, c</sup> Rui Huang,<sup>a</sup> Sai Yan,<sup>a</sup> Xingyong Xie,<sup>b, c</sup> Qinfang Zhang<sup>\*d, e</sup>

<sup>a</sup> Faculty of Mathematics and Physics, Huaiyin Institute of Technology, Huaian 223003, China

<sup>b</sup> National & Local Joint Engineering Research Center for Mineral Salt Deep Utilization, Huaiyin Institute of Technology, Huaian 223003, China

<sup>c</sup> Key Laboratory for Palygorskite Science and Applied Technology of Jiangsu Province, Huaiyin Institute of Technology, Huaian 223003, China

<sup>d</sup> School of Materials Science and Engineering, Yancheng Institute of Technology, Yancheng 224051, China

<sup>e</sup> Jiangsu Provincial Key Laboratory of Eco-Environmental Materials, Yancheng Institute of Technology, Yancheng 224051, China

\*Corresponding author.

Email address: [wyzong126@126.com](mailto:wyzong126@126.com) (Y. Z. Wang)

\*Corresponding author.

Email address: [qfangzhang@gmail.com](mailto:qfangzhang@gmail.com) (Q.F. Zhang)

**Table S1** The relative energies per unit cell for different configurations in eV of Ti<sub>2</sub>BSO and Ti<sub>2</sub>BSSe monolayers.

| MBene                | I | II    | III   | IV    |
|----------------------|---|-------|-------|-------|
| Ti <sub>2</sub> BSO  | 0 | 0.209 | 0.621 | 0.232 |
| Ti <sub>2</sub> BSSe | 0 | 0.536 | 0.440 | 0.132 |

**Table S2** The calculated lattice constant  $a_0$  (Å), bond length  $l$  (Å), and Bader charge  $\Delta Q$  (e) transferred from Ti to S (T) atom of Ti<sub>2</sub>BSO and Ti<sub>2</sub>BSSe monolayers.

| Ti <sub>2</sub> BOT  | $a_0$ | $l_{\text{Ti-S}}$ | $l_{\text{Ti-T}}$ | $\Delta Q_{\text{S}}$ | $\Delta Q_{\text{T}}$ |
|----------------------|-------|-------------------|-------------------|-----------------------|-----------------------|
| Ti <sub>2</sub> BSO  | 3.130 | 2.384             | 1.998             | 0.418                 | 1.207                 |
| Ti <sub>2</sub> BSSe | 3.259 | 2.380             | 2.541             | 0.542                 | 0.314                 |

**Table S3** The calculated elastic constants  $C_{ij}$  (N m<sup>-1</sup>) and Young's modulus  $Y$  (N m<sup>-1</sup>) of Ti<sub>2</sub>BSO and Ti<sub>2</sub>BSSe monolayers.

| Ti <sub>2</sub> BOT  | $C_{11}=C_{22}$ | $C_{12}$ | $C_{66}$ | $Y$    |
|----------------------|-----------------|----------|----------|--------|
| Ti <sub>2</sub> BSO  | 132.21          | 26.88    | 52.66    | 126.74 |
| Ti <sub>2</sub> BSSe | 135.99          | 19.13    | 58.43    | 133.29 |

**Table S4** Diffusion constants ( $D$ ) of Na and K on two surfaces of Ti<sub>2</sub>BSO and Ti<sub>2</sub>BSSe monolayers.

| Surface                 | $D_{\text{Na}}$ (cm <sup>2</sup> s <sup>-1</sup> ) | $D_{\text{K}}$ (cm <sup>2</sup> s <sup>-1</sup> ) |
|-------------------------|----------------------------------------------------|---------------------------------------------------|
| Ti <sub>2</sub> BSO-S   | $2.028 \times 10^{-4}$                             | $2.889 \times 10^{-3}$                            |
| Ti <sub>2</sub> BSO-O   | $8.569 \times 10^{-7}$                             | $7.048 \times 10^{-5}$                            |
| Ti <sub>2</sub> BSSe-S  | $1.169 \times 10^{-4}$                             | $7.778 \times 10^{-4}$                            |
| Ti <sub>2</sub> BSSe-Se | $1.933 \times 10^{-4}$                             | $1.237 \times 10^{-3}$                            |

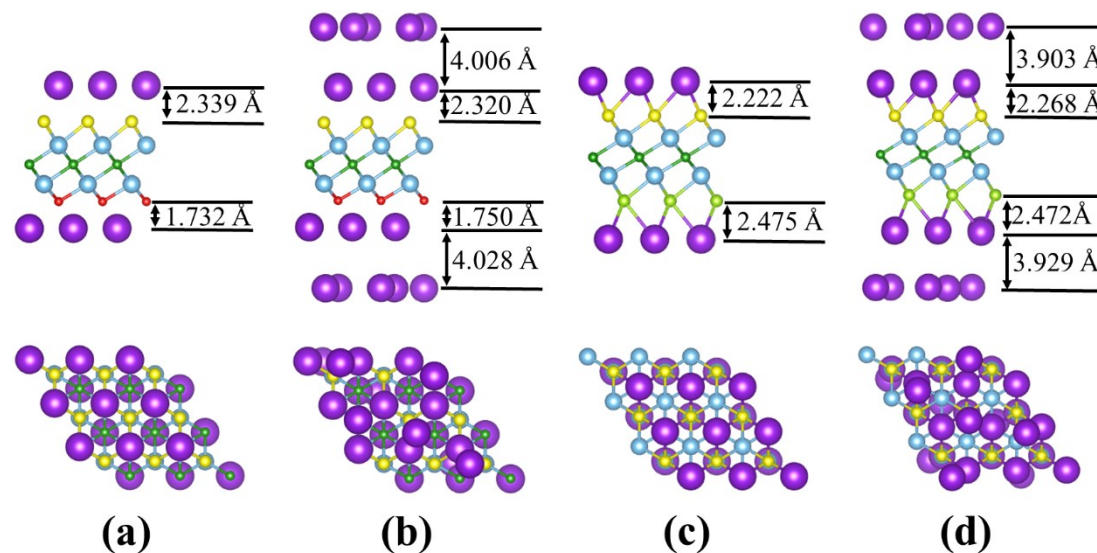

**Fig. S1** Side and top views of K adsorbed (a)-(b) Ti<sub>2</sub>BSO and (c)-(d) Ti<sub>2</sub>BSSe monolayers.

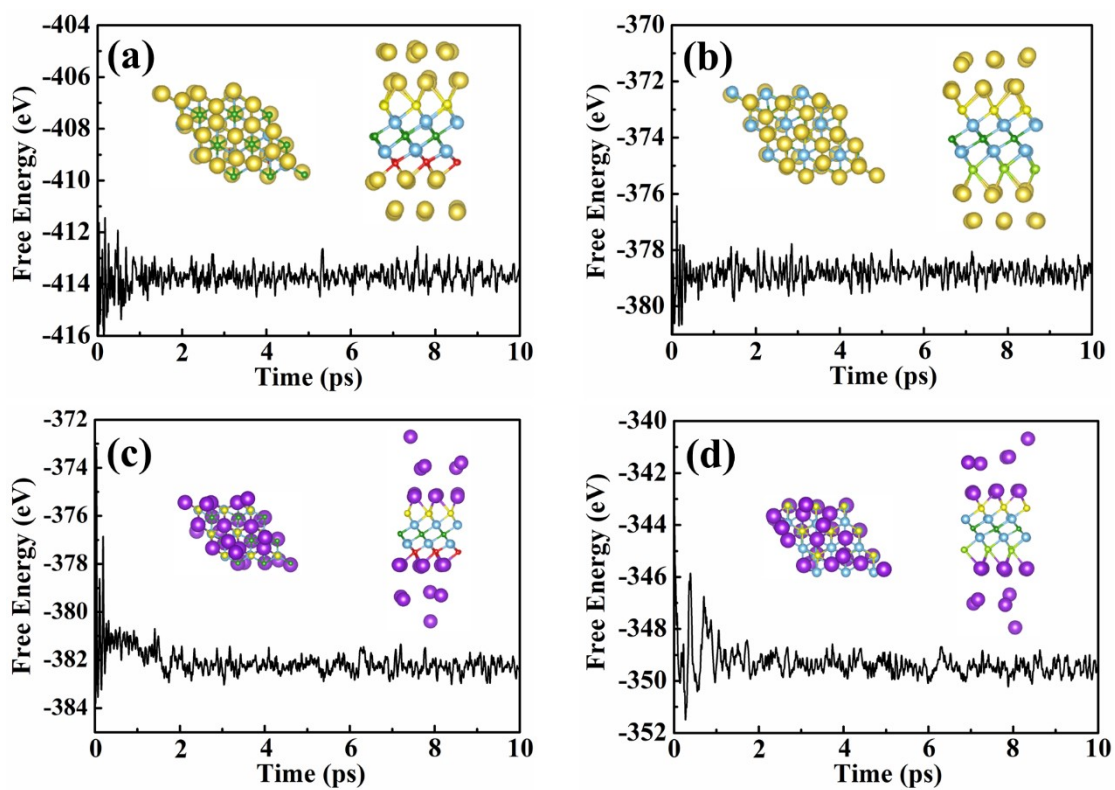

**Fig. S2** The variations of free energy for (a)  $\text{Na}_4\text{Ti}_2\text{BSO}$  and (b)  $\text{Na}_4\text{Ti}_2\text{BSSe}$  (c)  $\text{K}_{3.11}\text{Ti}_2\text{BSO}$  (d)  $\text{K}_{3.11}\text{Ti}_2\text{BSSe}$  monolayers at 300 K during the AIMD simulations (insets are the final structures after simulations).
